# Supplementary material
Source: HighWire-hosted journal article supplement (doi:10.1101/rna.079131.122)
Supplement: Supplemental_Tables_and_Figures.docx [file Supplemental_Tables_and_Figures.docx]

**Supplementary data**

**Table S1**: Oligonucleotides used in this study

| Oligonucleotide name | Sequence | Purpose |
| --- | --- | --- |
| rrnO-F | GATCTAATACGACTCACTATAGGTTAAGTTAGAAAGGGCGC | Amplification of *B. subtilis rrnO* gene |
| rrnO-R | GATCCTCGAGATGGTTAAGTCCTCGATC | Amplification of *B. subtilis rrnO* gene |
| G2553A-1 | GGTCCCAAGGGTATGGCTATTCGCCATTTAAAGTGGTACG | *B. subtilis rrnO* gene mutagenesis |
| G2553A-2 | CGTACCACTTTAAATGGCGAATAGCCATACCCTTGGACC | *B. subtilis rrnO* gene mutagenesis |
| G2553C-1 | GGTCCCAAGGGTATGGCTCTTCGCCATTTAAAGTGGTACG | *B. subtilis rrnO* gene mutagenesis |
| G2553C-2 | CGTACCACTTTAAATGGCGAAGAGCCATACCCTTGGACC | *B. subtilis rrnO* gene mutagenesis |
| G2553U-1 | GGTCCCAAGGGTATGGCTTTTCGCCATTTAAAGTGGTACG | *B. subtilis rrnO* gene mutagenesis |
| G2553U-2 | CGTACCACTTTAAATGGCGAAAAGCCATACCCTTGGACC | *B. subtilis rrnO* gene mutagenesis |
| ysgA-DNAz | AATGGGCGAAGGCTAGCTACAACGAAGCCCAACCC | DNAzyme |
| Hyb-1 | AATGGGCGAACAGCCCAACCC | Hybridization-protection spanning 2543-2562 of 23S rRNA |
| Hyb-2 | TAAGCCTGTTATCCCCGGG | Hybridization-protection spanning 1906-1925 of 23S rRNA |
| Hyb-3 | GGCGACCGCCCCAGTCAAACT | Hybridization-protection spanning 2241-2261 of 23S rRNA |
| Hyb-4 | GGACCGTTATAGTTACGGCC | Hybridization-protection spanning 2440-2459 of 23S rRNA |
| MS-1 | ATGAGCCGACATCGAGGTGCC | RNAseH cleavage of 23S rRNA |
| MS-2 | TTCTGAACCCAGCTCGCGTA | RNAseH cleavage of 23S rRNA |

**Table S2**. Data collection and refinement statistics (Statistics for the highest-resolution shell are shown in parentheses).

| **Wavelength** | 0.980109 |
| --- | --- |
| **Resolution range** | 45.85 - 1.877 (1.944 - 1.877) |
| **Space group** | P 21 21 21 |
| **Unit cell** | 64.88 66.45 129.6 90 90 90 |
| **Total reflections** | 719932 (69808) |
| **Unique reflections** | 46485 (4520) |
| **Multiplicity** | 15.5 (15.4) |
| **Completeness (%)** | 99.73 (97.86) |
| **Mean I/sigma(I)** | 30.08 (2.21) |
| **Wilson B-factor** | 39.62 |
| **R-merge** | 0.04927 (1.161) |
| **R-meas** | 0.051 (1.201) |
| **R-pim** | 0.01297 (0.3008) |
| **CC1/2** | 0.999 (0.796) |
| **CC*** | 1 (0.941) |
| **Reflections used in refinement** | 46482 (4519) |
| **Reflections used for R-free** | 2323 (223) |
| **R-work** | 0.1821 (0.3186) |
| **R-free** | 0.2074 (0.3386) |
| **CC(work)** | 0.965 (0.764) |
| **CC(free)** | 0.959 (0.663) |
| **RMS(bonds)** | 0.017 |
| **RMS(angles)** | 1.45 |
| **Ramachandran favored (%)** | 99.19 |
| **Ramachandran outliers (%)** | 0.00 |


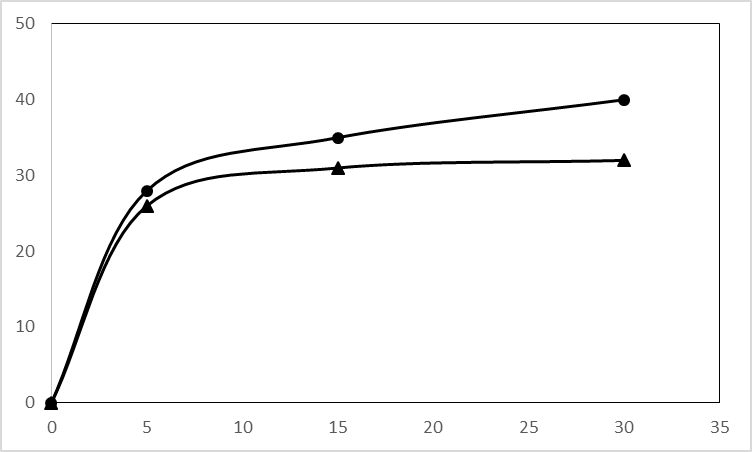


min

103 cpm

**Figure S1**. YsgA methylates RNA from *E. coli* and *B. subtilis* *ΔysgA* cells. 50 µg of total RNA extracted from *E. coli* (▲) or *B. subtilis* *ΔysgA* (●) cells were incubated with 0.25 M [methyl 3H] SAM and 100 ng of purified YsgA. After incubation, reaction mixtures were processed as described in Materials and Methods and the radioactivity incorporated in the different RNA preparations was measured using a scintillation counter.


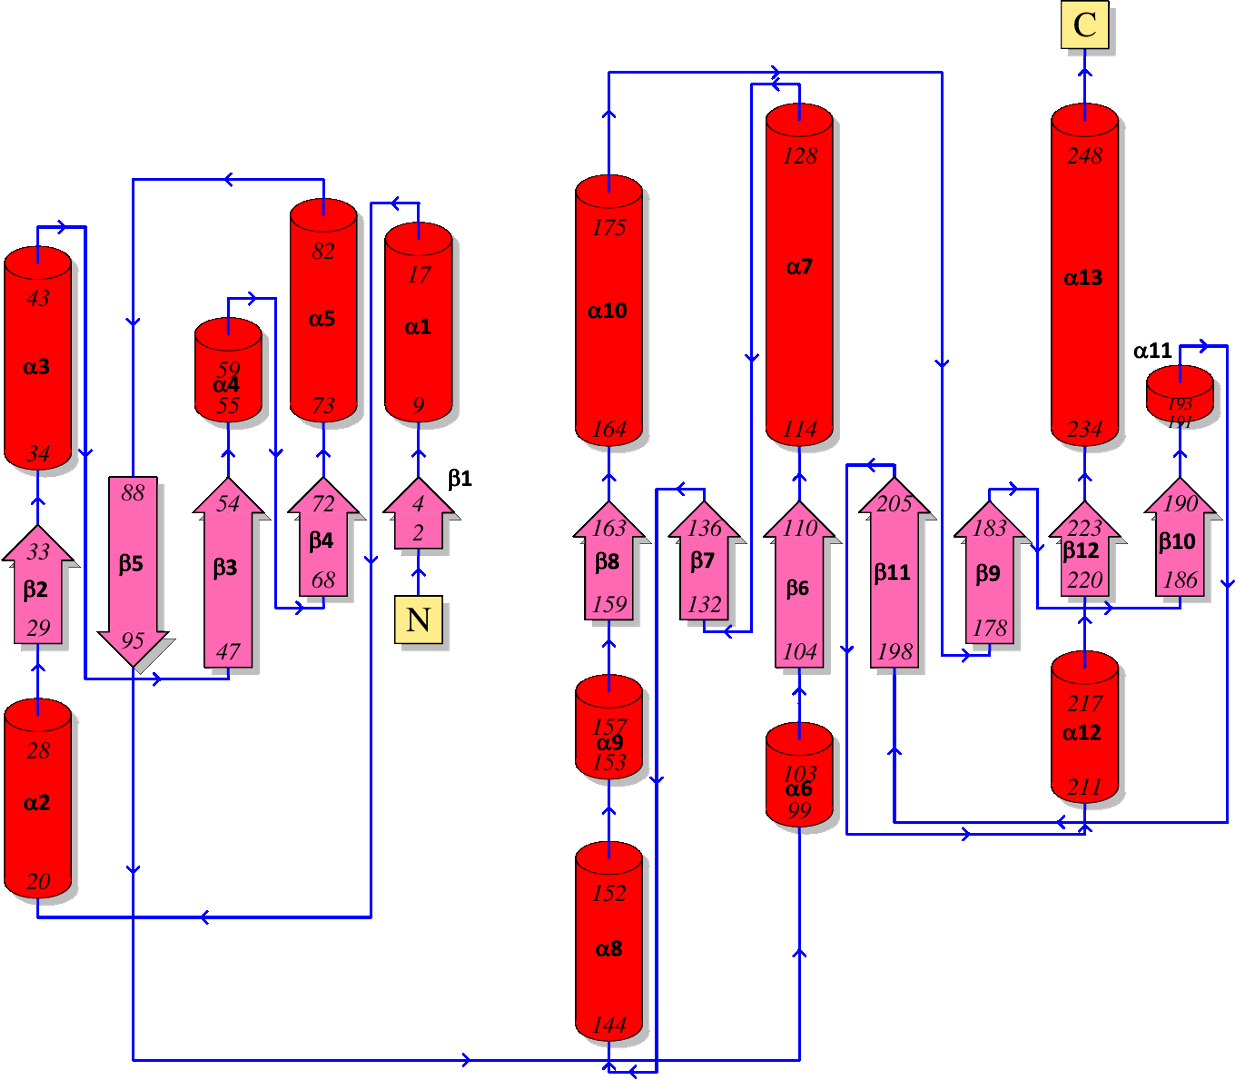


**Figure S2**. Topology diagram of YsgA (PDBSum).

**Figure S3**. Size exclusion chromatography analysis of YsgA. The pure protein was loaded on a Superose 12 10/300 GL (GE Healthcare) and eluted with buffer B (20 mM Tris, 100 mM, NaCl, 2 mM DTT, pH 8.0). Flow rate: 0.5 mL/min. UV absorbance was monitored at 280 nm. The column was calibrated using a gel filtration standard mix resuspended in the same buffer (lyophilized mix of thyroglobulin, bovine γ-globulin, chicken ovalbumin, equine myoglobin, and vitamin B12 (Biorad).

1 MKQIESAKNQKVKDWKKLHTKKERTKTNTFLIEGEHLVEEALKSPGIVKEILVKDETRIPSDLETGIQCY

71 MLSEDAFSAVTETETPQQIAAVCHMPEEKLATARKVLLIDAVQDPGNLGTMIRTADAAGLDAVVLGDGTA

141 DAFNGKTLRSAQGSHFHIPVVRRNLPSYVDELKAEGVKVYGTALQNGAPYQEIPQSESFALIVGNEGAGV

211 DAALLEKTDLNLYVPLYGQAESLNVAVAAAILVYHLRG

**Figure S4**. Amino acid sequence of YsgA. The three sequence motifs (Gustafsson et al. 1996) that characterize the SPOUT RNA methyltransferase superfamily are highlighted in gray. Residues mutated in this study to confirm that YsgA belongs to the SPOUT superfamily are underlined (N117, R123, E206 and N234).

**Figure S5**. **A.** Overlay of the closest structural homologs of YsgA based on the SPOUT domain (CTD, left) or the *N*-terminal domain (NTD, right): YsgA, Ttha0275, RlmB, SPOUT RNA methyltransferases from *Sinorhizobium meliloti* (*Sm*MTase) or *Porphyromonas gingivalis* (*Pg*MTase), AviRB, RrmA, NHR and Tsr. For the sake of clarity, only one protomer is represented. **B.** Overlay of the YsgA NTD with the L7Ae/L30e ribosomal proteins (L7Ae: *Archaeoglobus fulgidus*; L30e-h: human; L30e-sc *Saccharomyces cerevisiae*).
